# Supplementary material for: Simultaneous analytical method for 296 pesticide multiresidues in root and rhizome based herbal medicines with GC-MS/MS
Source: PubMed Central journal article supplement (PMC10325055; doi:10.1371/journal.pone.0288198), 2023-07-06
Supplement: pone.0288198.s001.pdf [file pone.0288198.s001.pdf]

## Supporting information

**S1 Table. Retention times ( $t_R$ ), multiple reaction monitoring (MRM) transitions, and collision energies (CEs) for 296 pesticides in GC-MS/MS.**

| No.  | Pesticide name              | $t_R$<br>(min) | MRM transition                                   |                 |
|------|-----------------------------|----------------|--------------------------------------------------|-----------------|
|      |                             |                | Precursor ion > Product ion (CE, V)<br>Qualifier | Qualifier       |
| 1    | 2,6-Diisopropyl-naphthalene | 12.647         | 212.0>197.0(15)                                  | 197.0>167.0(30) |
| 2    | Acetochlor                  | 9.460          | 223.0>146.0(10)                                  | 174.0>146.0(10) |
| 3    | EMA                         | 8.070          | 135.0>120.0(10)                                  | 120.0>77.0(20)  |
| 4    | HEMA                        | 9.287          | 151.0>132.0(20)                                  | 151.0>117.0(40) |
| 5    | Acrinathrin                 | 20.059         | 181.0>152.0(30)                                  | 181.0>127.0(30) |
| 6    | Alachlor                    | 14.459         | 188.0>160.0(10)                                  | 160.0>130.0(30) |
| 7    | Aldrin                      | 15.299         | 263.0>228.0(20)                                  | 263.0>193.0(40) |
| 8    | Dieldrin                    | 16.993         | 263.0>228.0(25)                                  | 263.0>193.0(40) |
| 9    | Allidochlor                 | 8.333          | 134.0>56.0(5)                                    | 132.0>56.0(10)  |
| 10   | Ametryn                     | 14.640         | 227.0>185.0(5)                                   | 227.0>170.0(10) |
| 11   | Anilofos                    | 19.381         | 226.0>184.0(5)                                   | 226.0>157.0(15) |
| 12-1 | Aramite_1                   | 17.041         | 187.0>65.0(15)                                   | 185.0>65.0(10)  |
| 12-2 | Aramite_2                   | 17.310         | 187.0>65.0(15)                                   | 185.0>65.0(10)  |
| 13   | Aspon                       | 15.147         | 211.0>115(10)                                    | 211.0>97.0(35)  |
| 14   | Atrazine                    | 12.853         | 215.0>200.0(10)                                  | 215.0>58.0(15)  |
| 15   | Azaconazole                 | 17.081         | 219.0>175.0(15)                                  | 217.0>173.0(15) |
| 16   | Benfluralin                 | 11.679         | 292.0>264.0(10)                                  | 292.0>160.0(20) |
| 17   | Benfuresate                 | 14.197         | 256.0>163.0(5)                                   | 163.0>121.0(5)  |
| 18   | Benodanil                   | 17.718         | 231.0>203.0(20)                                  | 231.0>76.0(25)  |
| 19   | Benoxacor                   | 13.959         | 176.0>120.0(5)                                   | 120.0>93.0(15)  |
| 20   | Benzoylprop-ethyl           | 18.697         | 292.0>105.0(10)                                  | 105.0>77.0(10)  |
| 21   | BHC-alpha                   | 12.259         | 219.0>183.0(10)                                  | 219.0>145.0(20) |
| 22   | BHC-Beta                    | 12.261         | 219.0>183.0(10)                                  | 219.0>145.0(20) |
| 23   | BHC-Delta                   | 13.095         | 219.0>183.0(10)                                  | 219.0>145.0(20) |
| 24   | BHC-Gamma                   | 13.079         | 219.0>183.0(10)                                  | 219.0>145.0(20) |
| 25   | BifenoX                     | 19.405         | 341>310(10)                                      | 189.0>126.0(20) |
| 26   | Bifenthrin                  | 18.998         | 181>166(15)                                      | 181.0>165.0(30) |
| 27   | Binapacryl                  | 21.801         | 83 > 55 (10)                                     | 83 > 53 (15)    |
| 28   | Boscalid                    | 22.215         | 140.0>112(10)                                    | 140.0>76.0(25)  |
| 29   | Bromobutide                 | 14.341         | 232.0>176.0(10)                                  | 232.0>119.0(10) |
| 30   | Bromophos-ethyl             | 16.299         | 303.0>211.0(30)                                  | 97.0>65.0(20)   |
| 31   | Bromophos-methyl            | 15.624         | 331.0>316.0(15)                                  | 125.0>47.0(10)  |
| 32   | Bromopropylate              | 19.007         | 341.0>185.0(20)                                  | 341.0>155.0(40) |
| 33   | Bupirimate                  | 17.000         | 273.0>193.0(10)                                  | 166.0>96.0(10)  |
| 34   | Buprofezin                  | 17.019         | 175.0>132.0(15)                                  | 172.0>57.0(15)  |
| 35   | Butachlor                   | 16.469         | 188.0>160.0(10)                                  | 176.0>147.0(10) |
| 36   | Butafenacil                 | 21.467         | 331.0>180.0(20)                                  | 180.0>124.0(22) |
| 37   | Butralin                    | 15.541         | 266.0>220.0(10)                                  | 266.0>174.0(20) |
| 38   | Butylate                    | 9.354          | 156.0>57.0(5)                                    | 146.0>90.0(5)   |
| 39   | Cadusafos                   | 11.998         | 159.0>97.0(20)                                   | 158.0>97.0(20)  |

| No.  | Pesticide name       | t <sub>R</sub><br>(min) | MRM transition                      |                 |
|------|----------------------|-------------------------|-------------------------------------|-----------------|
|      |                      |                         | Precursor ion > Product ion (CE, V) |                 |
|      |                      |                         | Qualifier                           | Qualifier       |
| 40   | Carbophenothion      | 17.967                  | 342.0>157.0(15)                     | 157.0>45.0(15)  |
| 41   | Carboxin             | 17.042                  | 235.0>143.0(10)                     | 235.0>87.0(20)  |
| 42   | Carfentrazone-ethyl  | 17.868                  | 340.0>312.0(10)                     | 312.0>151.0(20) |
| 43   | Chinomethionat       | 16.420                  | 234.0>206.0(10)                     | 234.0>148.0(30) |
| 44   | Chlorbenside         | 16.381                  | 268.0>125.0(10)                     | 143.0>108.0(10) |
| 45   | Chlorbufam           | 12.866                  | 153.0>125.0(10)                     | 153.0>90.0(20)  |
| 46-1 | Chlordane_1          | 16.384                  | 373.0>266.0(20)                     | 272.0>237.0(20) |
| 46-2 | Chlordane_2          | 16.589                  | 373.0>266.0(20)                     | 272.0>237.0(20) |
| 47   | Chlorethoxyfos       | 11.070                  | 153.0>125.0(5)                      | 153.0>97.0(15)  |
| 48   | Chlorfenapyr         | 17.257                  | 247.0>227.0(15)                     | 247.0>200.0(27) |
| 49   | Chlorfenson          | 16.735                  | 175.0>111.0(10)                     | 111.0>75.0(15)  |
| 50   | Chlorflurenol-methyl | 16.279                  | 217.0>152.0(25)                     | 215.0>152.0(20) |
| 51   | Chlornitrofen        | 17.938                  | 317.0>287.0(15)                     | 236.0>173.0(20) |
| 52   | Chlorobenzilate      | 17.403                  | 251.0>111.0(20)                     | 251.0>75.0(25)  |
| 53   | Chloroneb            | 9.999                   | 206.0>191.0(10)                     | 191.0>113.0(15) |
| 54   | Chloropropylate      | 17.397                  | 251.0>139.0(20)                     | 139.0>111.0(15) |
| 55   | Chlorothalonil       | 13.433                  | 266.0>231.0(20)                     | 266.0>170.0(30) |
| 56   | Chlorpropham         | 11.594                  | 213.0>171.0(10)                     | 171.0>127.0(15) |
| 57   | Chlorpyrifos         | 15.242                  | 314.0>258.0(20)                     | 199.0>171.0(15) |
| 58   | Chlorpyrifos-methyl  | 14.675                  | 286.0>271.0(25)                     | 286.0>93.0(20)  |
| 59   | Chlorthal-dimethyl   | 15.322                  | 301.0>223.0(25)                     | 299.0>221.0(25) |
| 60   | Chlorthion           | 15.492                  | 297.0>109.0(15)                     | 297.0>79.0(40)  |
| 61   | Chlorthiophos        | 17.560                  | 325.0>269.0(10)                     | 297.0>269.0(5)  |
| 62   | Chlozolinate         | 15.946                  | 331.0>259.0(5)                      | 259.0>188.0(10) |
| 63   | Cinidon-ethyl        | 25.304                  | 358.0>330.0(10)                     | 330.0>302.0(20) |
| 64   | Cinmethylin          | 14.698                  | 169.0>107.0(10)                     | 154.0>111.0(5)  |
| 65   | Clomazone            | 12.949                  | 204.0>107.0(25)                     | 125.0>89.0(15)  |
| 66   | Coumaphos            | 21.270                  | 226.0>163.0(10)                     | 210.0>182.0(5)  |
| 67   | Cyanophos            | 13.189                  | 243.0>109.0(10)                     | 125.0>79.0(5)   |
| 68   | Cyflufenamid         | 17.141                  | 223.0>203.0(12)                     | 188.0>88.0(40)  |
| 69   | Cyfluthrin           | 21.927                  | 226.0>206.0(10)                     | 163.0>127.0(5)  |
| 70   | Cyhalofop-buthyl     | 20.020                  | 256.0>120.0(20)                     | 229.0>109.0(15) |
| 71   | Cyhalothrin          | 20.155                  | 208.0>181.0(5)                      | 197.0>141.0(10) |
| 72   | Cypermethrin         | 22.245                  | 165.0>91.0(10)                      | 163.0>127.0(5)  |
| 73   | Cyprazine            | 14.286                  | 227.0>212.0(10)                     | 212.0>109.0(30) |
| 74   | Cyprodinil           | 15.844                  | 224.0>208.0(20)                     | 224.0>77.0(40)  |
| 75   | DDD (p,p)            | 17.545                  | 237.0>165.0(25)                     | 235.0>165.0(25) |
| 76   | DDE (p,p)            | 16.912                  | 248.0>176.0(30)                     | 246.0>176.0(30) |
| 77   | DDT (o,p)            | 17.558                  | 237.0>165.0(25)                     | 235.0>165.0(25) |
| 78   | DDT (p,p)            | 18.174                  | 237.0>165.0(25)                     | 235.0>165.0(25) |
| 79   | Deltamethrin         | 23.723                  | 253.0>174.0(5)                      | 181.0>152.0(30) |
| 80   | Tralomethrin         | 23.723                  | 253.0>174.0(5)                      | 181.0>152.0(30) |
| 81   | Desmetryn            | 14.201                  | 213.0>171.0(5)                      | 213.0>58.1(10)  |
| 82   | Dialifos             | 20.646                  | 357.0>97.0(25)                      | 208.0>89.0(25)  |
| 83   | Di-allate            | 12.071                  | 234.0>192.0(15)                     | 234.0>150.0(20) |
| 84   | Diazinon             | 131.313                 | 199.0>135.0(10)                     | 199.0>93.0(15)  |

| No.   | Pesticide name     | t <sub>R</sub><br>(min) | MRM transition                      |                 |
|-------|--------------------|-------------------------|-------------------------------------|-----------------|
|       |                    |                         | Precursor ion > Product ion (CE, V) |                 |
|       |                    |                         | Qualifier                           | Qualifier       |
| 85    | Dichlobenil        | 8.782                   | 173.0>136.0(5)                      | 171.0>136.0(25) |
| 86    | Dichlofenthion     | 14.222                  | 279.0>223.0(10)                     | 223.0>205.0(15) |
| 87    | Dichlofluanid      | 11.643                  | 200.0>45.0(5)                       | 200.0>44.0(25)  |
| 88    | Dichlormid         | 8.829                   | 172.0>108.0(5)                      | 166.0>56.0(10)  |
| 89    | Diclobutrazol      | 17.078                  | 272.0>161.0(10)                     | 270.0>159.0(15) |
| 90    | Diclofop-methyl    | 18.389                  | 340.0>253.0(10)                     | 281.0>120.0(15) |
| 91    | Dicloran           | 12.572                  | 206.0>148.0(25)                     | 206.0>124.0(30) |
| 92    | Dicofol            | 15.533                  | 139.0>111.0(15)                     | 139.0>75.0(35)  |
| 93    | Dicrotophos        | 11.632                  | 193.0>127.0(5)                      | 127.0>95.0(15)  |
| 94    | Diethatyl-ethyl    | 16.573                  | 188.0>160.0(5)                      | 162.0>147.0(10) |
| 95    | Diethofencarb      | 15.275                  | 267.0>225.0(5)                      | 225.0>168.0(10) |
| 96-1  | Difenoconazole_1   | 23.610                  | 325.0>267.0(15)                     | 325.0>265.0(15) |
| 96-2  | Difenoconazole_2   | 23.691                  | 325.0>267.0(15)                     | 325.0>265.0(15) |
| 97    | Diflufenican       | 18.392                  | 266.0>218.0(25)                     | 266.0>183.0(25) |
| 98    | Dimepiperate       | 16.179                  | 145.0>112.0(5)                      | 145.0>69.0(15)  |
| 99    | Dimethachlor       | 14.224                  | 197.0>148.0(10)                     | 197.0>120(20)   |
| 100   | Dimethametryn      | 15.933                  | 212.0>122.0(5)                      | 212.0>94.0(20)  |
| 101   | Dimethenamid       | 14.226                  | 230.0>154.0(10)                     | 154.0>111.0(10) |
| 102   | Dimethipin         | 12.873                  | 124.0>76.0(5)                       | 118.0>58.0(5)   |
| 103-1 | Dimethomorph_1     | 24.320                  | 301.0>165.0(15)                     | 301.0>152.0(15) |
| 103-2 | Dimethomorph_2     | 24.740                  | 301.0>165.0(15)                     | 301.0>152.0(15) |
| 104-1 | Dimethylvinphos_1  | 15.250                  | 297.0>109.0(15)                     | 295.0>109.0(15) |
| 104-2 | Dimethylvinphos_2  | 15.266                  | 297.0>109.0(15)                     | 295.0>109.0(15) |
| 105   | Diniconazole       | 17.482                  | 268.0>232.0(15)                     | 268.0>136.0(35) |
| 106   | Dinitramine        | 13.534                  | 261.0>241.0(10)                     | 261.0>195.0(20) |
| 107   | Dioxathion         | 13.062                  | 125.0>97.0(10)                      | 125.0>79.0(30)  |
| 108   | Diphenamid         | 15.650                  | 167.0>165.0(30)                     | 167.0>152.0(20) |
| 109   | Diphenylamine      | 11.269                  | 169.0>168.0(10)                     | 169.0>167.0(30) |
| 110   | Dithiopyr          | 14.720                  | 354.0>306.0(5)                      | 354.0>286.0(15) |
| 111   | Edifenphos         | 17.993                  | 201.0>109.0(15)                     | 173.0>109.0(10) |
| 112   | Endosulfan-alpha   | 16.590                  | 195.0>159.0(10)                     | 195.0>125.0(20) |
| 113   | Endosulfan-beta    | 17.477                  | 195.0>159.0(10)                     | 195.0>125.0(30) |
| 114   | Endosulfan-sulfate | 18.109                  | 272.0>235.0(20)                     | 272.0>117.0(40) |
| 115   | Endrin             | 16.997                  | 263.0>228.0(20)                     | 263.0>193.0(40) |
| 116   | Endrin-ketone      | 18.962                  | 317.0>281.0(10)                     | 317.0>245.0(20) |
| 117   | EPN                | 19.063                  | 157.0>110.0(20)                     | 157.0>77.0(20)  |
| 118   | Epoxiconazole      | 18.646                  | 192.0>138.0(15)                     | 192.0>111.0(25) |
| 119   | EPTC               | 8.823                   | 132.0>90.0(5)                       | 128.0>86.0(5)   |
| 120-1 | Etaconazole_1      | 17.429                  | 245.0>173.0(20)                     | 173.0>145.0(15) |
| 120-2 | Etaconazole_2      | 17.493                  | 245.0>173.0(20)                     | 173.0>145.0(15) |
| 121   | Ethalfuralin       | 11.405                  | 316.0>276.0(5)                      | 276.0>202.0(15) |
| 122   | Ethion             | 17.529                  | 231.0>175.0(10)                     | 231.0>129.0(25) |
| 123   | Ethofumesate       | 14.990                  | 207.0>161.0(5)                      | 207.0>137.0(10) |
| 124   | Ethoprophos        | 11.323                  | 158.0>114.0(5)                      | 158.0>97.0(20)  |
| 125   | Ethychlozate       | 16.008                  | 165.0>138.0(10)                     | 165.0>102.0(15) |
| 126   | Etoxazole          | 19.182                  | 300.0>270.0(25)                     | 204.0>176.0(10) |

| No.   | Pesticide name     | t <sub>R</sub><br>(min) | MRM transition                      |                 |
|-------|--------------------|-------------------------|-------------------------------------|-----------------|
|       |                    |                         | Precursor ion > Product ion (CE, V) |                 |
|       |                    |                         | Qualifier                           | Qualifier       |
| 127   | Etridiazole        | 9.560                   | 211.0>183.0(10)                     | 211.0>140.0(25) |
| 128   | Fenamidone         | 19.266                  | 238.0>103.0(20)                     | 238.0>91.0(30)  |
| 129   | Fenarimol          | 20.441                  | 251.0>139.0(15)                     | 219.0>107.0(10) |
| 130   | Fenbuconazole      | 21.733                  | 198.0>129.0(5)                      | 129.0>78.0(20)  |
| 131   | Fenclorphos        | 14.683                  | 285.0>270.0(15)                     | 285.0>93.0(25)  |
| 132   | Fenclorim          | 12.288                  | 224.0>189.0(20)                     | 189.0>104.0(10) |
| 133   | Fenfuram           | 13.636                  | 201.0>109.0(25)                     | 109.0>53.0(20)  |
| 134   | Fenitrothion       | 14.951                  | 277.0>260.0(5)                      | 277.0>109.0(20) |
| 135   | Fenobucarb         | 10.960                  | 150.0>121.0(5)                      | 121.0>103.0(15) |
| 136   | Fenothiocarb       | 16.511                  | 160.0>106.0(10)                     | 160.0>72.0(15)  |
| 137   | Fenoxanil          | 17.260                  | 189.0>154.0(10)                     | 189.0>125.0(10) |
| 138   | Fenpropathrin      | 19.222                  | 265.0>210.0(10)                     | 265.0>89.0(40)  |
| 139   | Fenpropimorph      | 15.373                  | 128.0>110.0(10)                     | 128.0>70.0(15)  |
| 140   | Fenpyrazamine      | 20.444                  | 230.0>188.0(10)                     | 230.0>117.0(30) |
| 141   | Fenson             | 15.627                  | 268.0>77.0(20)                      | 141.0>77.0(10)  |
| 142   | Fenthion           | 15.323                  | 278.0>169.0(20)                     | 278.0>109.0(20) |
| 143-1 | Fenvalerate_1      | 23.143                  | 169.0>127.0(10)                     | 167.0>125.0(10) |
| 143-2 | Fenvalerate_2      | 23.365                  | 169.0>127.0(10)                     | 167.0>125.0(10) |
| 144   | Fipronil           | 15.887                  | 367.0>255.0(30)                     | 367.0>213.0(30) |
| 145   | Flamprop-isopropyl | 17.390                  | 105.0>77.0(15)                      | 105.0>51.0(40)  |
| 146   | Fluacrypyrim       | 16.533                  | 204.0>189.0(5)                      | 145.0>102.0(30) |
| 147   | Fluazifop-butyl    | 17.257                  | 282.0>238.0(25)                     | 282.0>91.0(5)   |
| 148   | Fluchloralin       | 13.342                  | 326.0>63.0(15)                      | 306.0>264.0(5)  |
| 149-1 | Flucythrinate_1    | 22.318                  | 199.0>107.0(25)                     | 157.0>107.0(15) |
| 149-2 | Flucythrinate_2    | 22.541                  | 199.0>107.0(25)                     | 157.0>107.0(15) |
| 150   | Fluensulfone       | 10.882                  | 119.0>92.0(10)                      | 119.0>59.0(30)  |
| 151   | Flufenpyr-ethyl    | 17.351                  | 408.0>345.0(15)                     | 321.0>286.0(15) |
| 152   | Flumetralin        | 16.451                  | 143.0>117.0(20)                     | 143.0>107.0(30) |
| 153   | Flumioxazine       | 22.640                  | 354.0>326.0(10)                     | 287.0>259.0(5)  |
| 154   | Fluopyram          | 16.013                  | 173.0>145.0(20)                     | 173.0>95.0(35)  |
| 155   | Flurochloridone    | 15.539                  | 311.0>174.0(20)                     | 187.0>109.0(20) |
| 156   | Fluorodifen        | 16.670                  | 190.0>126.1(20)                     | 190.0>75.0(20)  |
| 157   | Fluquinconazole    | 21.286                  | 340.0>286.0(30)                     | 340.0>108.0(40) |
| 158   | Flurtamone         | 19.575                  | 333.0>120.0(15)                     | 199.0>157.0(20) |
| 159   | Flusilazole        | 16.996                  | 233.0>165.0(20)                     | 233.0>152.0(20) |
| 160   | Flutianil          | 22.676                  | 231.0>216.0(5)                      | 231.0>200.0(10) |
| 161-1 | Fluvalinate_1      | 23.262                  | 250.0>200.0(20)                     | 250.0>55.0(20)  |
| 161-2 | Fluvalinate_2      | 23.329                  | 250.0>200.0(20)                     | 250.0>55.0(20)  |
| 162   | Fluxapyroxad       | 18.971                  | 159.0>139.0(10)                     | 159.0>43.0(30)  |
| 163   | Fonofos            | 13.285                  | 246.0>137.0(5)                      | 246.0>109.0(15) |
| 164   | Formothion         | 14.026                  | 170.0>93.0(15)                      | 126.0>93.0(5)   |
| 165   | Fthalide           | 15.566                  | 243.0>215.0(5)                      | 241.0>213.0(10) |
| 166   | Halfenprox         | 22.213                  | 265.0>117.0(10)                     | 263.0>129.0(40) |
| 167   | Heptachlor         | 14.653                  | 274.0>237.0(20)                     | 272.0>237.0(20) |
| 168   | Heptachlor epoxide | 15.995                  | 353.0>253.0(30)                     | 217.0>182.0(20) |
| 169   | Heptenophos        | 10.528                  | 124.0>89.0(15)                      | 124.0>63.0(40)  |

| No.   | Pesticide name      | t <sub>R</sub><br>(min) | MRM transition                      |                 |
|-------|---------------------|-------------------------|-------------------------------------|-----------------|
|       |                     |                         | Precursor ion > Product ion (CE, V) |                 |
|       |                     |                         | Qualifier                           | Qualifier       |
| 170   | Hexachlorbenzene    | 13.350                  | 284.0>249.0(21)                     | 284.0>214.0(30) |
| 171   | Hexythiazox         | 16.398                  | 184.0>149.0(5)                      | 156.0>155.0(5)  |
| 172   | Indanofan           | 19.388                  | 159.0>103.0(15)                     | 139.0>75.0(35)  |
| 173   | Indoxacarb          | 24.819                  | 203.0>134.0(15)                     | 203.0>106.0(15) |
| 174   | Ipconazole          | 20.302                  | 125.0>99.0(20)                      | 125.0>89.0(20)  |
| 175   | Iprobenfos          | 13.905                  | 204.0>121.0(35)                     | 204.0>91.0(10)  |
| 176   | Iprodione           | 18.839                  | 314.0>245.0(10)                     | 314.0>56.0(20)  |
| 177   | Isazofos            | 13.597                  | 257.0>162.0(5)                      | 208.0>166.0(10) |
| 178   | Isofenphos          | 15.964                  | 213.0>185.0(5)                      | 213.0>121.0(20) |
| 179   | Isofenphos-methyl   | 15.730                  | 199.0>121.0(15)                     | 199.0>93.0(30)  |
| 180   | Isoprocarb          | 10.253                  | 136.0>121.0(10)                     | 136.0>77.0(30)  |
| 181   | Isopropalin         | 16.686                  | 264.0>222.0(10)                     | 238.0>165.0(10) |
| 182   | Isoprothiolane      | 16.790                  | 189.0>145.0(10)                     | 189.0>89.0(20)  |
| 183   | Isopyrazam          | 20.635                  | 359.0>159.0(40)                     | 159.0>139.0(10) |
| 184   | Isotianil           | 18.105                  | 297.0>180.0(15)                     | 180.0>91.0(20)  |
| 185   | Isoxadifen-ethyl    | 17.875                  | 222.0>205.0(5)                      | 222.0>204.0(20) |
| 186   | Kresoxim-methyl     | 17.009                  | 131.0>89.0(35)                      | 116.0>89.0(15)  |
| 187   | Leptophos           | 19.817                  | 377.0>362.0(25)                     | 171.0>77.0(25)  |
| 188   | Mefenpyr-diethyl    | 18.638                  | 299.0>253.0(10)                     | 253.0>190.0(20) |
| 189   | Mepanipyrim         | 16.588                  | 223.0>222.0(10)                     | 222.0>221.0(20) |
| 190   | Mepronil            | 17.741                  | 269.0>119.0(15)                     | 269.0>91.0(40)  |
| 191   | Metalaxyl           | 14.631                  | 249.0>190.0(5)                      | 234.0>146.0(20) |
| 192   | Methidathion        | 16.332                  | 145.0>85.0(5)                       | 145.0>58.0(15)  |
| 193   | Methoprotryne       | 17.071                  | 256.0>212.0(15)                     | 256.0>170.0(25) |
| 194   | Methoxychlor        | 19.189                  | 227.0>169.0(25)                     | 227.0>141.0(40) |
| 195   | Methyl trithion     | 17.407                  | 157.0>121.0(35)                     | 125.0>47.0(15)  |
| 196   | Metolachlor         | 15.204                  | 238.0>162.0(10)                     | 162.0>133.0(15) |
| 197   | Metribuzin          | 14.353                  | 198.0>110.0(10)                     | 198.0>82.0(20)  |
| 198   | MGK_264             | 15.888                  | 164.0>98.0(10)                      | 164.0>67.0(5)   |
| 199   | Mirex               | 21.116                  | 272.0>237.0(20)                     | 272.0>143.0(10) |
| 200   | Molinate            | 10.380                  | 187.0>126.0(5)                      | 126.0>98.0(5)   |
| 201   | Monolinuron         | 12.875                  | 214.0>61.0(5)                       | 126.0>99.0(15)  |
| 202   | Myclobutanil        | 16.974                  | 179.0>152.0(5)                      | 179.0>125.0(15) |
| 203   | Nitrapyrin          | 9.544                   | 196.0>135.0(20)                     | 194.0>133.0(20) |
| 204   | Nitrothal-isopropyl | 15.508                  | 236.0>194.0(10)                     | 194.0>120.0(20) |
| 205-1 | Nonachlor_1         | 16.630                  | 409.0>300.0(15)                     | 407.0>300.0(30) |
| 205-2 | Nonachlor_2         | 17.558                  | 409.0>300.0(15)                     | 407.0>300.0(30) |
| 206   | Nuarimol            | 20.443                  | 139.0>111.0(20)                     | 107.0>52.0(15)  |
| 207   | O-Phenylphenol      | 10.178                  | 169.0>141.0(15)                     | 169.0>115.0(30) |
| 208   | Oxadiazon           | 16.899                  | 258.0>175.0(15)                     | 175.0>112.0(5)  |
| 209   | Oxadixyl            | 17.507                  | 163.0>132.0(5)                      | 163.0>117.0(25) |
| 210   | Oxyfluorfen         | 16.979                  | 361.0>300.0(20)                     | 300.0>223.0(20) |
| 211   | Pacllobutrazol      | 16.470                  | 236.0>167.0(5)                      | 236.0>125.0(10) |
| 212   | Parathion           | 17.920                  | 291.0>109.0(10)                     | 291.0>81.0(45)  |
| 213   | Parathion-ethyl     | 15.363                  | 291.0>109.0(10)                     | 291.0>81.0(40)  |
| 214   | Parathion-methyl    | 14.474                  | 263.0>109.0(15)                     | 263.0>79.0(35)  |

| No.   | Pesticide name          | t <sub>R</sub><br>(min) | MRM transition                      |                 |
|-------|-------------------------|-------------------------|-------------------------------------|-----------------|
|       |                         |                         | Precursor ion > Product ion (CE, V) |                 |
|       |                         |                         | Qualifier                           | Qualifier       |
| 215   | Penconazole             | 15.937                  | 248.0>192.0(20)                     | 248.0>157.0(30) |
| 216   | Pendimethalin           | 15.815                  | 252.0>208.0(5)                      | 252.0>162.0(10) |
| 217   | Penflufen               | 17.672                  | 274.0>141.0(15)                     | 141.0>84.0(15)  |
| 218   | Pentachlorobenzonitrile | 13.068                  | 275.0>240.0(20)                     | 275.0>179.0(30) |
| 219   | Penthiopyrad            | 17.469                  | 302.0>177.0(20)                     | 177.0>101.0(20) |
| 220   | Pentoxazone             | 19.732                  | 287.0>70.0(10)                      | 285.0>70.0(15)  |
| 221-1 | Permethrin_1            | 21.124                  | 183.0>168.0(20)                     | 183.0>155.0(10) |
| 221-2 | Permethrin_2            | 21.275                  | 183.0>168.0(20)                     | 183.0>155.0(10) |
| 222   | Perthane                | 17.294                  | 223.0>193.0(20)                     | 223.0>165.0(20) |
| 223   | Phenthoate              | 16.082                  | 274.0>125.0(15)                     | 274.0>121.0(10) |
| 224   | Phosalone               | 19.793                  | 182.0>138.0(5)                      | 182.0>102.0(15) |
| 225   | Phosmet                 | 19.023                  | 160.0>133.0(10)                     | 160.0>77.0(30)  |
| 226-1 | Phosphamidon_1          | 13.782                  | 264.0>127.0(10)                     | 127.0>109.0(15) |
| 226-2 | Phosphamidon_2          | 14.137                  | 264.0>127.0(10)                     | 127.0>109.0(15) |
| 227   | Picoxystrobin           | 16.534                  | 335.0>173.0(10)                     | 145.0>102.0(30) |
| 228   | Piperonyl butoxide      | 18.400                  | 176.0>145.0(10)                     | 176.0>131.0(25) |
| 229   | Pirimicarb              | 13.864                  | 238.0>166.0(10)                     | 166.0>96.0(15)  |
| 230   | Pirimiphos-ethyl        | 15.611                  | 318.0>166.0(10)                     | 304.0>168.0(10) |
| 231   | Pirimiphos-methyl       | 14.894                  | 290.0>125.0(20)                     | 233.0>151.0(5)  |
| 232   | Pretilachlor            | 16.790                  | 262.0>202.0(5)                      | 162.0>132.0(20) |
| 233   | Prochloraz              | 21.343                  | 308.0>70.0                          | 180.0>138.0     |
| 234   | 2,4,6-Trichlorophenol   | 8.889                   | 196.0>97.0(40)                      | 132.0>97.0(15)  |
| 235   | Procymidone             | 16.152                  | 285.0>96.0(5)                       | 283.0>96.0(5)   |
| 236   | Prodiamine              | 14.933                  | 321.0>279.0(10)                     | 275.0>255.0(10) |
| 237   | Profenofos              | 16.565                  | 339.0>269.0(10)                     | 337.0>267.0(10) |
| 238   | Profluralin             | 13.051                  | 318.0>199.0(20)                     | 318.0>55.0(10)  |
| 239   | Prohydrojasmon          | 13.586                  | 184.0>83.0(15)                      | 153.0>97.0(5)   |
| 240   | Prometon                | 12.719                  | 210.0>168.0(10)                     | 183.0>168.0(5)  |
| 241   | Prometryn               | 14.699                  | 241.0>199.0(10)                     | 226.0>184.0(10) |
| 242   | Propachlor              | 11.005                  | 176.0>92.0(20)                      | 169.0>93.0(10)  |
| 243   | Propanil                | 14.271                  | 217.0>161.0(25)                     | 161.0>126.0(25) |
| 244   | Propazine               | 12.935                  | 229.0>58.0(15)                      | 214.0>172.0(10) |
| 245   | Propetamphos            | 13.139                  | 194.0>166.0(5)                      | 138.0>64.0(20)  |
| 246   | Propham                 | 9.601                   | 179.0>93.0(15)                      | 137.0>93.0(10)  |
| 247-1 | Propiconazole_1         | 18.015                  | 259.0>173.0(5)                      | 259.0>69.0(10)  |
| 247-2 | Propiconazole_2         | 18.119                  | 259.0>173.0(5)                      | 259.0>69.0(10)  |
| 248   | Propisochlor            | 14.572                  | 162.0>147.0(15)                     | 162.0>120.0(20) |
| 249   | Propyzamide             | 13.267                  | 173.0>145.0(20)                     | 173.0>109.0(35) |
| 250   | Prothiofos              | 16.779                  | 267.0>239.0(10)                     | 267.0>221.0(20) |
| 251   | Pyracarbolid            | 15.654                  | 217.0>125.0(15)                     | 125.0>107.0(15) |
| 252   | Pyraclufos              | 20.742                  | 194.0>139.0(10)                     | 194.0>138.0(20) |
| 253   | Pyraflufen-ethyl        | 18.064                  | 412.0>349.0(10)                     | 349.0>307.0(15) |
| 254   | Pyrazophos              | 20.381                  | 232.0>204.0(10)                     | 221.0>193.0(10) |
| 255   | Pyridalyl               | 22.528                  | 204.0>176.0(10)                     | 204.0>148.0(20) |
| 256   | Pyrifenoxy              | 16.408                  | 187.0>124.0(20)                     | 171.0>100.0(25) |
| 257   | Pyrifthalid             | 20.483                  | 318.0>274.0(5)                      | 318.0>273.0(20) |

| No.   | Pesticide name       | t <sub>R</sub><br>(min) | MRM transition                      |                 |
|-------|----------------------|-------------------------|-------------------------------------|-----------------|
|       |                      |                         | Precursor ion > Product ion (CE, V) |                 |
|       |                      |                         | Qualifier                           | Qualifier       |
| 258   | Pyrimethanil         | 13.444                  | 198.0>158.0(20)                     | 198.0>118.0(35) |
| 259-1 | Pyriminobac-methyl_1 | 17.365                  | 302.0>256.0(20)                     | 302.0>230.0(15) |
| 259-2 | Pyriminobac-methyl_2 | 18.032                  | 302.0>256.0(20)                     | 302.0>230.0(15) |
| 260   | Quinalphos           | 16.104                  | 146.0>118.0(10)                     | 149.0>91.0(30)  |
| 261   | Quinoxifen           | 18.053                  | 307.0>237.0(20)                     | 237.0>208.0(30) |
| 262   | Quintozene           | 12.977                  | 295.0>237.0(20)                     | 249.0>214.0(10) |
| 263   | Quizalofop-ethyl     | 22.344                  | 372.0>299.0(10)                     | 299.0>255.0(15) |
| 264   | Silafluofen          | 22.662                  | 286.0>258.0(10)                     | 179.0>91.0(10)  |
| 265   | Simeconazole         | 14.485                  | 121.0>101.0(15)                     | 121.0>75.0(35)  |
| 266   | Simetryn             | 14.569                  | 213.0>185.0(10)                     | 213.0>170.0(10) |
| 267   | Spiromesifen         | 18.684                  | 272.0>254.0(10)                     | 272.0>209.0(10) |
| 268-1 | Spiroxamine_1        | 14.443                  | 198.0>126.0(5)                      | 100.0>72.0(5)   |
| 268-2 | Spiroxamine_2        | 14.944                  | 198.0>126.0(5)                      | 100.0>72.0(5)   |
| 269   | Sulfotep             | 11.766                  | 322.0>146.0(25)                     | 202.0>146.0(10) |
| 270   | Tebuconazole         | 17.880                  | 252.0>127.0(30)                     | 250.0>125.0(30) |
| 271   | Tebufenpyrad         | 19.349                  | 333.0>171.0(20)                     | 276.0>171.0(10) |
| 272   | Tebupirimfos         | 13.851                  | 276.0>234.0(5)                      | 261.0>137.0(15) |
| 273   | Tecnazene            | 10.860                  | 215.0>179.0(25)                     | 213.0>142.0(25) |
| 274   | Tefluthrin           | 13.623                  | 177.0>137.0(20)                     | 177.0>127.0(20) |
| 275   | Terbacil             | 13.596                  | 161.0>88.0(20)                      | 160.0>76.0(15)  |
| 276   | Terbumeton           | 12.977                  | 210.0>100.0(20)                     | 169.0>154.0(10) |
| 277   | Terbutryn            | 14.949                  | 241.0>185.0(5)                      | 185.0>170.0(5)  |
| 278   | Tetrachlorvinphos    | 16.420                  | 331.0>109.0(25)                     | 329.0>109.0(25) |
| 279   | Tetraconazole        | 15.433                  | 336.0>218.0(20)                     | 336.0>204.0(40) |
| 280   | Tetradifon           | 19.667                  | 229.0>201.0(10)                     | 159.0>111.0(20) |
| 281-1 | Tetramethrin_1       | 18.899                  | 164.0>107.0(15)                     | 164.0>77.0(25)  |
| 281-2 | Tetramethrin_2       | 19.074                  | 164.0>107.0(15)                     | 164.0>77.0(25)  |
| 282   | Tetrasul             | 17.752                  | 323.0>251.0(15)                     | 321.0>252.0(15) |
| 283   | Thifluzamide         | 16.915                  | 194.0>166.0(10)                     | 194.0>125.0(25) |
| 284   | Thiometon            | 12.426                  | 125.0>47.0(25)                      | 93.0>63.0(5)    |
| 285   | Thionazin            | 10.937                  | 248.0>140.0(10)                     | 192.0>96.0(15)  |
| 286   | Tolclofos-methyl     | 14.499                  | 265.0>250.0(15)                     | 265.0>93.0(30)  |
| 287   | Triadimefon          | 15.443                  | 208.0>181.0(10)                     | 208.0>111.0(35) |
| 288-1 | Triadimenol_1        | 16.138                  | 130.0>65.0(25)                      | 128.0>65.0(20)  |
| 288-2 | Triadimenol_2        | 16.267                  | 130.0>65.0(25)                      | 128.0>65.0(20)  |
| 289   | Tri-allate           | 13.742                  | 268.0>226.0(20)                     | 268.0>184.0(10) |
| 290   | Triazophos           | 17.763                  | 161.0>134.0(5)                      | 161.0>106.0(15) |
| 291   | Tridiphane           | 14.718                  | 187.0>159.0(15)                     | 173.0>109.0(30) |
| 292   | Trifloxystrobin      | 17.927                  | 222.0>130.0(10)                     | 116.0>89.0(15)  |
| 293   | Triflumizole         | 16.180                  | 278.0>43.0(15)                      | 206>179.0(15)   |
| 294   | Trifluralin          | 11.570                  | 306.0>264.0(10)                     | 264.0>160.0(15) |
| 295   | Vinclozolin          | 14.423                  | 198.0>145.0(15)                     | 187.0>124.0(20) |
| 296   | Zoxamide             | 18.530                  | 187.0>159.0(20)                     | 187.0>123.0(20) |
