# Supplementary material for: Simultaneous analytical method for 296 pesticide multiresidues in root and rhizome based herbal medicines with GC-MS/MS
Source: PubMed Central journal article supplement (PMC10325055; doi:10.1371/journal.pone.0288198), 2023-07-06
Supplement: pone.0288198.s002.pdf [file pone.0288198.s002.pdf]

**S2 Table. The linearities of calibration curves expressed as  $r^2$  for the target pesticides in herbal medicines.**

| No. | Pesticide name             | Correlation coefficient ( $r^2$ ). |                     |                      |
|-----|----------------------------|------------------------------------|---------------------|----------------------|
|     |                            | <i>C. officinale</i>               | <i>R. glutinosa</i> | <i>P. lactiflora</i> |
| 1   | 2,6-Diisopropylnaphthalene | 0.9885                             | 0.9988              | 0.9993               |
| 2   | Acetochlor                 | 0.9910                             | 0.9877              | 0.9857               |
| 3   | EMA                        | 0.9928                             | 0.9721              | 0.9878               |
| 4   | HEMA                       | 0.9789                             | 0.9912              | 0.9817               |
| 5   | Acrinathrin                | 0.9971                             | 0.9138              | 0.9752               |
| 6   | Alachlor                   | 0.9997                             | 0.9951              | 0.9989               |
| 7   | Aldrin                     | 0.9987                             | 0.9972              | 0.9993               |
| 8   | Dieldrin                   | 0.9990                             | 0.9990              | 0.9880               |
| 9   | Allidochlor                | 0.9708                             | 0.9997              | 0.9998               |
| 10  | Ametryn                    | 0.9937                             | 0.9997              | 0.9979               |
| 11  | Anilofos                   | 0.9843                             | 0.9991              | 0.9720               |
| 12  | Aramite                    | 0.9801                             | 0.9915              | 0.9919               |
| 13  | Aspon                      | 0.9771                             | 0.9929              | 0.9961               |
| 14  | Atrazine                   | 0.9705                             | 0.9994              | 0.9999               |
| 15  | Azaconazole                | 0.9910                             | 0.9999              | 0.9990               |
| 16  | Benfluralin                | 0.9954                             | 0.9949              | 0.9972               |
| 17  | Benfuresate                | 0.9878                             | 0.9934              | 0.9913               |
| 18  | Benodanil                  | 0.9810                             | 0.9963              | 0.9969               |
| 19  | Benoxacor                  | 0.9980                             | 0.9966              | 0.9991               |
| 20  | Benzoylprop-ethyl          | 0.9815                             | 0.9755              | 0.9894               |
| 21  | BHC-alpha                  | 0.9957                             | 0.9998              | 0.9994               |
| 22  | BHC-beta                   | 0.9978                             | 0.9921              | 0.9855               |
| 23  | BHC-delta                  | 0.9982                             | 0.9969              | 0.9929               |
| 24  | BHC-gamma                  | 0.9998                             | 0.9981              | 0.9932               |
| 25  | Bifenox                    | 0.9991                             | 0.9989              | 0.9987               |
| 26  | Bifenthrin                 | 0.9972                             | 0.9991              | 0.9981               |
| 27  | Binapacryl                 | 0.9957                             | 0.9992              | 0.9982               |
| 28  | Boscalid                   | 0.9998                             | 0.9982              | 0.9990               |
| 29  | Bromobutide                | 0.9878                             | 0.9913              | 0.9876               |
| 30  | Bromophos-ethyl            | 0.9949                             | 1.0000              | 0.9996               |
| 31  | Bromophos-methyl           | 0.9917                             | 0.9820              | 0.9902               |
| 32  | Bromopropylate             | 0.9908                             | 0.9977              | 0.9991               |
| 33  | Bupirimate                 | 0.9997                             | 0.9999              | 0.9094               |
| 34  | Buprofezin                 | 0.9997                             | 0.9993              | 0.9994               |
| 35  | Butachlor                  | 0.9987                             | 0.9940              | 0.9944               |
| 36  | Butafenacil                | 0.9934                             | 0.9667              | 0.9931               |
| 37  | Butralin                   | 0.9995                             | 0.9986              | 0.9977               |
| 38  | Butylate                   | 0.9967                             | 0.9975              | 0.9995               |
| 39  | Cadusafos                  | 0.9979                             | 0.9983              | 0.9993               |
| 40  | Carbophenothion            | 0.9370                             | 0.9965              | 0.9998               |

| No. | Pesticide name       | Correlation coefficient ( $r^2$ ). |                     |                      |
|-----|----------------------|------------------------------------|---------------------|----------------------|
|     |                      | <i>C. officinale</i>               | <i>R. glutinosa</i> | <i>P. lactiflora</i> |
| 41  | Carboxin             | 0.9763                             | 0.9991              | 0.9123               |
| 42  | Carfentrazone-ethyl  | 0.9989                             | 0.9993              | 0.9910               |
| 43  | Chinomethionat       | 0.9994                             | 0.9996              | 0.9984               |
| 44  | Chlorbenside         | 0.9971                             | 0.9949              | 0.9908               |
| 45  | Chlorbufam           | 0.9757                             | 0.9995              | 0.9995               |
| 46  | Chlordane            | 0.9997                             | 0.9980              | 0.9881               |
| 47  | Chlorethoxyfos       | 0.9992                             | 0.9932              | 0.9784               |
| 48  | Chlorfenapyr         | 0.9849                             | 0.9967              | 0.9989               |
| 49  | Chlorfenson          | 0.9971                             | 0.9932              | 0.9885               |
| 50  | Chlorflurenol-methyl | 0.9998                             | 0.9991              | 0.9992               |
| 51  | Chlornitrofen        | 0.9997                             | 0.9993              | 0.9997               |
| 52  | Chlorobenzilate      | 0.9928                             | 0.9891              | 0.9973               |
| 53  | Chloroneb            | 0.9956                             | 0.9938              | 0.9706               |
| 54  | Chloropropylate      | 0.9997                             | 0.9993              | 0.9994               |
| 55  | Chlorothalonil       | 0.9987                             | 0.9940              | 0.9944               |
| 56  | Chlorpropham         | 0.9934                             | 0.9667              | 0.9931               |
| 57  | Chlorpyrifos         | 0.9995                             | 0.9986              | 0.9977               |
| 58  | Chlorpyrifos-methyl  | 0.9967                             | 0.9975              | 0.9995               |
| 59  | Chlorthal -dimethyl  | 0.9979                             | 0.9983              | 0.9993               |
| 60  | Chlorthion           | 0.9943                             | 0.9917              | 0.9937               |
| 61  | Chlorthiophos        | 1.0000                             | 1.0000              | 0.9957               |
| 62  | Chlozolate           | 0.9990                             | 0.9989              | 0.9992               |
| 63  | Cinidon-ethyl        | 0.9704                             | 0.9853              | 0.9886               |
| 64  | Cinmethylin          | 0.9953                             | 0.9995              | 0.9913               |
| 65  | Clomazone            | 0.9929                             | 0.9717              | 0.9928               |
| 66  | Coumaphos            | 0.9415                             | 0.9975              | 0.9960               |
| 67  | Cyanophos            | 0.9370                             | 0.9965              | 0.9998               |
| 68  | Cyflufenamid         | 0.9763                             | 0.9991              | 0.9123               |
| 69  | Cyfluthrin           | 0.9989                             | 0.9993              | 0.9910               |
| 70  | Cyhalofop-buthyl     | 0.9964                             | 0.9973              | 0.9989               |
| 71  | Cyhalothrin          | 0.9855                             | 0.9996              | 0.9943               |
| 72  | Cypermethrin         | 0.9986                             | 0.9964              | 0.9854               |
| 73  | Cyprazine            | 0.9989                             | 0.9999              | 0.9976               |
| 74  | Cyprodinil           | 0.9860                             | 0.9888              | 0.9984               |
| 75  | DDD (p,p)            | 0.9843                             | 0.9914              | 0.9649               |
| 76  | DDE (p,p)            | 0.9945                             | 0.9997              | 0.9972               |
| 77  | DDT (o,p)            | 0.9849                             | 0.9967              | 0.9989               |
| 78  | DDT (p,p)            | 0.9971                             | 0.9932              | 0.9885               |
| 79  | Deltamethrin         | 0.9998                             | 0.9991              | 0.9992               |
| 80  | Tralomethrin         | 0.9997                             | 0.9993              | 0.9997               |
| 81  | Desmetryn            | 0.9928                             | 0.9891              | 0.9973               |
| 82  | Dialifos             | 0.9968                             | 0.9899              | 0.9900               |
| 83  | Di-allate            | 0.9984                             | 0.9999              | 0.9953               |

| No. | Pesticide name        | Correlation coefficient ( $r^2$ ). |                     |                      |
|-----|-----------------------|------------------------------------|---------------------|----------------------|
|     |                       | <i>C. officinale</i>               | <i>R. glutinosa</i> | <i>P. lactiflora</i> |
| 84  | Diazinon              | 0.9615                             | 0.9621              | 0.9808               |
| 85  | Dichlobenil           | 0.9979                             | 0.9982              | 0.9986               |
| 86  | Dichlofenthion        | 0.9948                             | 0.9974              | 0.9997               |
| 87  | Dichlofluanid         | 0.9715                             | 0.9879              | 0.9972               |
| 88  | Dichlormid            | 0.9999                             | 0.9998              | 0.9978               |
| 89  | Diclobutrazol         | 0.9868                             | 0.9939              | 0.9998               |
| 90  | Diclofop-methyl       | 0.9910                             | 0.9999              | 0.9990               |
| 91  | Dicloran              | 0.9954                             | 0.9949              | 0.9972               |
| 92  | Dicofol               | 0.9878                             | 0.9934              | 0.9913               |
| 93  | Dicrotophos           | 0.9810                             | 0.9963              | 0.9969               |
| 94  | Diethatyl-ethyl       | 0.9980                             | 0.9966              | 0.9991               |
| 95  | Diethofencarb         | 0.9815                             | 0.9755              | 0.9894               |
| 96  | Difenoconazole        | 0.9957                             | 0.9998              | 0.9994               |
| 97  | Diflufenican          | 0.9990                             | 0.9996              | 0.9997               |
| 98  | Dimepiperate          | 0.9300                             | 0.9987              | 0.9998               |
| 99  | Dimethachlor          | 0.9935                             | 0.9988              | 0.9188               |
| 100 | Dimethametryn         | 0.9901                             | 0.9992              | 0.9972               |
| 101 | Dimethenamid          | 0.9949                             | 0.9972              | 0.9959               |
| 102 | Dimethipin            | 0.9964                             | 0.9973              | 0.9989               |
| 103 | Dimethomorph (E,Z)    | 0.9855                             | 0.9996              | 0.9943               |
| 104 | Dimethylvinphos (E,Z) | 0.9986                             | 0.9964              | 0.9854               |
| 105 | Diniconazole          | 0.9860                             | 0.9888              | 0.9984               |
| 106 | Dinitramine           | 0.9843                             | 0.9914              | 0.9649               |
| 107 | Dioxathion            | 0.9945                             | 0.9997              | 0.9972               |
| 108 | Diphenamid            | 0.9758                             | 0.9994              | 0.9952               |
| 109 | Diphenylamine         | 0.9978                             | 0.9998              | 0.9901               |
| 110 | Dithiopyr             | 0.9914                             | 0.9987              | 0.9980               |
| 111 | Edifenphos            | 0.9971                             | 0.9949              | 0.9908               |
| 112 | Endosulfan-alpha      | 0.9870                             | 0.9995              | 0.9995               |
| 113 | Endosulfan-beta       | 0.9849                             | 0.9967              | 0.9738               |
| 114 | Endosulfan-sulfate    | 1.0000                             | 0.9999              | 0.9932               |
| 115 | Endrin                | 0.9955                             | 0.9755              | 0.9725               |
| 116 | Endrin-ketone         | 0.9803                             | 0.9989              | 0.9933               |
| 117 | EPN                   | 0.9995                             | 0.9985              | 0.9996               |
| 118 | Epoxiconazole         | 0.9908                             | 0.9974              | 0.9104               |
| 119 | EPTC                  | 0.9996                             | 0.9994              | 0.9999               |
| 120 | Etaconazole           | 0.9943                             | 0.9917              | 0.9937               |
| 121 | Ethalfluralin         | 0.9990                             | 0.9989              | 0.9992               |
| 122 | Ethion                | 0.9704                             | 0.9853              | 0.9886               |
| 123 | Ethofumesate          | 0.9953                             | 0.9995              | 0.9913               |
| 124 | Ethoprophos           | 0.9929                             | 0.9717              | 0.9928               |
| 125 | Ethychlozate          | 0.9415                             | 0.9975              | 0.9960               |
| 126 | Etoxazole             | 0.9370                             | 0.9965              | 0.9998               |

| No. | Pesticide name     | Correlation coefficient ( $r^2$ ). |                     |                      |
|-----|--------------------|------------------------------------|---------------------|----------------------|
|     |                    | <i>C. officinale</i>               | <i>R. glutinosa</i> | <i>P. lactiflora</i> |
| 127 | Etridiazole        | 0.9763                             | 0.9991              | 0.9123               |
| 128 | Fenamidone         | 0.9989                             | 0.9993              | 0.9910               |
| 129 | Fenarimol          | 0.9994                             | 0.9996              | 0.9984               |
| 130 | Fenbuconazole      | 0.9997                             | 0.9980              | 0.9881               |
| 131 | Fenchlorphos       | 0.9992                             | 0.9850              | 0.9868               |
| 132 | Fenclorim          | 0.9992                             | 0.9932              | 0.9784               |
| 133 | Fenfuram           | 0.9849                             | 0.9967              | 0.9989               |
| 134 | Fenitrothion       | 0.9971                             | 0.9932              | 0.9885               |
| 135 | Fenobucarb         | 0.9998                             | 0.9991              | 0.9992               |
| 136 | Fenothiocarb       | 0.9997                             | 0.9993              | 0.9997               |
| 137 | Fenoxanil          | 0.9928                             | 0.9891              | 0.9973               |
| 138 | Fenpropathrin      | 0.9968                             | 0.9899              | 0.9900               |
| 139 | Fenpropimorph      | 0.9984                             | 0.9999              | 0.9953               |
| 140 | Fenpyrazamine      | 0.9615                             | 0.9621              | 0.9808               |
| 141 | Fenson             | 0.9979                             | 0.9982              | 0.9986               |
| 142 | Fenthion           | 0.9948                             | 0.9974              | 0.9997               |
| 143 | Fenvalerate        | 0.9967                             | 0.9988              | 0.9980               |
| 144 | Fipronil           | 0.9996                             | 0.9986              | 0.9991               |
| 145 | Flamprop-isopropyl | 0.9783                             | 0.9762              | 0.9835               |
| 146 | Fluacrypyrim       | 0.9983                             | 0.9970              | 0.9958               |
| 147 | Fluazifop-butyl    | 0.9912                             | 0.9977              | 0.9987               |
| 148 | Fluchloralin       | 0.9995                             | 0.9218              | 0.9138               |
| 149 | Flucythrinate      | 0.9713                             | 0.9725              | 0.9813               |
| 150 | Fluensulfone       | 0.9949                             | 0.9939              | 0.9898               |
| 151 | Flufenpyr-ethyl    | 0.9972                             | 0.9879              | 0.9715               |
| 152 | Flumetralin        | 0.9978                             | 0.9998              | 0.9999               |
| 153 | Flumioxazine       | 0.9993                             | 0.9988              | 0.9885               |
| 154 | Fluopyram          | 0.9857                             | 0.9877              | 0.9910               |
| 155 | Flurochloridone    | 0.9878                             | 0.9721              | 0.9928               |
| 156 | Fluorodifen        | 0.9817                             | 0.9912              | 0.9789               |
| 157 | Fluquinconazole    | 0.9752                             | 0.9138              | 0.9971               |
| 158 | Flurtamone         | 0.9989                             | 0.9951              | 0.9997               |
| 159 | Flusilazole        | 0.9993                             | 0.9972              | 0.9987               |
| 160 | Flutianil          | 0.9880                             | 0.9990              | 0.9990               |
| 161 | Fluvalinate        | 0.9986                             | 0.9977              | 0.9973               |
| 162 | Fluxapyroxad       | 0.9998                             | 0.9999              | 0.9992               |
| 163 | Fonofos            | 0.9996                             | 0.9911              | 0.9990               |
| 164 | Formothion         | 0.9706                             | 0.9938              | 0.9956               |
| 165 | Fthalide           | 0.9994                             | 0.9993              | 0.9997               |
| 166 | Halfenprox         | 0.9944                             | 0.9940              | 0.9987               |
| 167 | Heptachlor         | 0.9931                             | 0.9667              | 0.9934               |
| 168 | Heptachlor epoxide | 0.9977                             | 0.9986              | 0.9995               |
| 169 | Heptenophos        | 0.9995                             | 0.9975              | 0.9967               |

| No. | Pesticide name      | Correlation coefficient ( $r^2$ ). |                     |                      |
|-----|---------------------|------------------------------------|---------------------|----------------------|
|     |                     | <i>C. officinale</i>               | <i>R. glutinosa</i> | <i>P. lactiflora</i> |
| 170 | Hexachlorbenzene    | 0.9993                             | 0.9983              | 0.9979               |
| 171 | Hexythiazox         | 0.9982                             | 0.9992              | 0.9957               |
| 172 | Indanofan           | 0.9990                             | 0.9982              | 0.9998               |
| 173 | Indoxacarb          | 0.9876                             | 0.9913              | 0.9878               |
| 174 | Ipconazole          | 0.9996                             | 1.0000              | 0.9949               |
| 175 | Iprobenfos          | 0.9902                             | 0.9820              | 0.9917               |
| 176 | Iprodione           | 0.9991                             | 0.9977              | 0.9908               |
| 177 | Isazofos            | 0.9094                             | 0.9999              | 0.9997               |
| 178 | Isofenphos          | 0.9962                             | 0.9998              | 0.9998               |
| 179 | Isofenphos-methyl   | 0.9995                             | 0.9993              | 0.9998               |
| 180 | Isoprocarb          | 0.9871                             | 1.0000              | 0.9991               |
| 181 | Isopropalin         | 0.9783                             | 0.9961              | 0.9971               |
| 182 | Isoprothiolane      | 0.9983                             | 0.9991              | 0.9995               |
| 183 | Isopyrazam          | 0.9911                             | 0.9756              | 0.9801               |
| 184 | Isotianil           | 0.9867                             | 0.9893              | 0.9729               |
| 185 | Isoxadifen-ethyl    | 0.9978                             | 0.9985              | 0.9982               |
| 186 | Kresoxim-methyl     | 0.9939                             | 0.9884              | 0.9964               |
| 187 | Leptophos           | 0.9990                             | 0.9988              | 0.9992               |
| 188 | Mefenpyr-diethyl    | 0.9909                             | 0.9878              | 0.9857               |
| 189 | Mepanipyrim         | 0.9998                             | 0.9997              | 0.9708               |
| 190 | Mepronil            | 0.9979                             | 0.9997              | 0.9937               |
| 191 | Metalaxyl           | 0.9843                             | 0.9720              | 0.9991               |
| 192 | Methidathion        | 0.9801                             | 0.9919              | 0.9915               |
| 193 | Methoprotryne       | 0.9771                             | 0.9961              | 0.9929               |
| 194 | Methoxychlor        | 0.9705                             | 0.9999              | 0.9994               |
| 195 | Methyl trithion     | 0.9960                             | 0.9990              | 0.9959               |
| 196 | Metolachlor         | 0.9833                             | 0.9959              | 0.9937               |
| 197 | Metribuzin          | 0.9982                             | 0.9929              | 0.9969               |
| 198 | MGK_264             | 0.9998                             | 0.9932              | 0.9981               |
| 199 | Mirex               | 0.9991                             | 0.9987              | 0.9989               |
| 200 | Molinate            | 0.9972                             | 0.9981              | 0.9991               |
| 201 | Monolinuron         | 1.0000                             | 0.9812              | 0.9991               |
| 202 | Myclobutanil        | 0.9911                             | 0.9995              | 0.9998               |
| 203 | Nitrapyrin          | 0.9999                             | 0.9994              | 0.9997               |
| 204 | Nitrothal-isopropyl | 0.9993                             | 0.9911              | 0.9989               |
| 205 | Nonachlor           | 0.9999                             | 0.9992              | 0.9999               |
| 206 | Nuarimol            | 0.9958                             | 0.9913              | 0.9977               |
| 207 | O-Phenylphenol      | 0.9997                             | 0.9999              | 0.9999               |
| 208 | Oxadiazon           | 0.9997                             | 0.9983              | 0.9998               |
| 209 | Oxadixyl            | 0.9998                             | 1.0000              | 1.0000               |
| 210 | Oxyfluorfen         | 0.9918                             | 0.9983              | 0.9996               |
| 211 | Paclobutrazol       | 0.9999                             | 0.9979              | 0.9999               |
| 212 | Parathion           | 0.9999                             | 0.9997              | 0.9998               |

| No. | Pesticide name          | Correlation coefficient ( $r^2$ ). |                     |                      |
|-----|-------------------------|------------------------------------|---------------------|----------------------|
|     |                         | <i>C. officinale</i>               | <i>R. glutinosa</i> | <i>P. lactiflora</i> |
| 213 | Parathion-ethyl         | 0.9995                             | 0.9884              | 0.9940               |
| 214 | Parathion-methyl        | 0.9999                             | 0.9997              | 0.9998               |
| 215 | Penconazole             | 0.9977                             | 0.9973              | 0.9993               |
| 216 | Pendimethalin           | 0.9961                             | 0.9908              | 0.9994               |
| 217 | Penflufen               | 0.9975                             | 0.9859              | 0.9989               |
| 218 | Pentachlorobenzonitrile | 0.9985                             | 0.9979              | 0.9954               |
| 219 | Penthiopyrad            | 0.9995                             | 0.9998              | 0.9998               |
| 220 | Pentoxazone             | 0.9996                             | 0.9988              | 0.9997               |
| 221 | Permethrin              | 0.9992                             | 0.9996              | 1.0000               |
| 222 | Perthane                | 0.9997                             | 0.9998              | 0.9990               |
| 223 | Phenthoate              | 1.0000                             | 0.9997              | 0.9997               |
| 224 | Phosalone               | 0.9994                             | 0.9984              | 0.9990               |
| 225 | Phosmet                 | 0.9975                             | 0.9998              | 0.9999               |
| 226 | Phosphamidon            | 0.9983                             | 0.9874              | 0.9975               |
| 227 | Picoxystrobin           | 0.9829                             | 0.9765              | 0.9814               |
| 228 | Piperonyl butoxide      | 0.9424                             | 0.9987              | 0.9986               |
| 229 | Pirimicarb              | 0.9874                             | 0.9827              | 0.9704               |
| 230 | Pirimiphos-ethyl        | 0.9980                             | 0.9988              | 0.9983               |
| 231 | Pirimiphos-methyl       | 0.9560                             | 0.9499              | 0.9836               |
| 232 | Pretilachlor            | 0.9996                             | 0.9963              | 0.9992               |
| 233 | Prochloraz              | 0.9894                             | 0.9786              | 0.9929               |
| 234 | 2,4,6-Trichlorophenol   | 0.9756                             | 0.9933              | 0.9954               |
| 235 | Procymidone             | 0.9928                             | 0.9986              | 0.9878               |
| 236 | Prodiamine              | 0.9998                             | 0.9982              | 0.9997               |
| 237 | Profenofos              | 0.9996                             | 0.9999              | 0.9999               |
| 238 | Profluralin             | 0.9987                             | 0.9993              | 0.9999               |
| 239 | Prohydrojasmon          | 0.9972                             | 1.0000              | 0.9981               |
| 240 | Prometon                | 0.9993                             | 0.9905              | 1.0000               |
| 241 | Prometryn               | 0.9880                             | 0.9998              | 0.9954               |
| 242 | Propachlor              | 0.9999                             | 0.9999              | 0.9998               |
| 243 | Propanil                | 0.9995                             | 0.9984              | 0.9999               |
| 244 | Propazine               | 0.9938                             | 0.9999              | 0.9927               |
| 245 | Propetamphos            | 0.9990                             | 0.9996              | 0.9997               |
| 246 | Propham                 | 0.9999                             | 0.9993              | 0.9995               |
| 247 | Propiconazole           | 0.9996                             | 0.9873              | 0.9994               |
| 248 | Propisochlor            | 0.9978                             | 0.9981              | 0.9895               |
| 249 | Propyzamide             | 0.9991                             | 0.9974              | 0.9999               |
| 250 | Prothiofos              | 0.9969                             | 0.9984              | 0.9962               |
| 251 | Pyracarbolid            | 0.9953                             | 0.9994              | 0.9996               |
| 252 | Pyraclufos              | 0.9978                             | 0.9998              | 0.9995               |
| 253 | Pyraflufen-ethyl        | 0.9994                             | 0.9995              | 0.9998               |
| 254 | Pyrazophos              | 0.9986                             | 0.9998              | 0.9998               |
| 255 | Pyridalyl               | 0.9994                             | 0.9986              | 0.9998               |

| No. | Pesticide name     | Correlation coefficient ( $r^2$ ). |                     |                      |
|-----|--------------------|------------------------------------|---------------------|----------------------|
|     |                    | <i>C. officinale</i>               | <i>R. glutinosa</i> | <i>P. lactiflora</i> |
| 256 | Pyrifenox          | 0.9985                             | 0.9986              | 0.9992               |
| 257 | Pyrifitalid        | 0.9997                             | 0.9961              | 0.9995               |
| 258 | Pyrimethanil       | 0.9908                             | 0.9975              | 0.9994               |
| 259 | Pyriminobac-methyl | 0.9959                             | 0.9985              | 0.9989               |
| 260 | Quinalphos         | 0.9998                             | 0.9996              | 0.9998               |
| 261 | Quinoxifen         | 0.9988                             | 0.9992              | 0.9997               |
| 262 | Quintozene         | 0.9996                             | 0.9997              | 1.0000               |
| 263 | Quizalofop-ethyl   | 0.9979                             | 0.9997              | 0.9990               |
| 264 | Silafluofen        | 0.9998                             | 1.0000              | 0.9990               |
| 265 | Simeconazole       | 0.9997                             | 0.9994              | 0.9997               |
| 266 | Simetryn           | 0.9984                             | 0.9943              | 0.9990               |
| 267 | Spiromesifen       | 0.9937                             | 1.0000              | 0.9917               |
| 268 | Spiroxamine        | 0.9957                             | 0.9990              | 1.0000               |
| 269 | Sulfotep           | 0.9886                             | 0.9953              | 0.9853               |
| 270 | Tebuconazole       | 0.9913                             | 0.9929              | 0.9995               |
| 271 | Tebufenpyrad       | 0.9928                             | 0.9415              | 0.9717               |
| 272 | Tebupirimfos       | 0.9960                             | 0.9945              | 0.9975               |
| 273 | Tecnazene          | 0.9822                             | 0.9996              | 0.9965               |
| 274 | Tefluthrin         | 0.9763                             | 0.9894              | 0.9991               |
| 275 | Terbacil           | 0.9989                             | 0.9756              | 0.9993               |
| 276 | Terbumeton         | 0.9964                             | 0.9928              | 0.9973               |
| 277 | Terbutryn          | 0.9855                             | 0.9998              | 0.9996               |
| 278 | Tetrachlorvinphos  | 0.9167                             | 0.9996              | 0.9228               |
| 279 | Tetraconazole      | 0.9986                             | 0.9987              | 0.9964               |
| 280 | Tetradifon         | 0.9989                             | 0.9972              | 0.9999               |
| 281 | Tetramethrin       | 0.9860                             | 0.9993              | 0.9888               |
| 282 | Tetrasul           | 0.9945                             | 0.9999              | 0.9997               |
| 283 | Thifluzamide       | 0.9849                             | 0.9995              | 0.9967               |
| 284 | Thiometon          | 0.9997                             | 0.9938              | 0.9993               |
| 285 | Thionazin          | 0.9987                             | 0.9990              | 0.9940               |
| 286 | Tolclofos-methyl   | 0.9934                             | 0.9999              | 0.9667               |
| 287 | Triadimefon        | 0.9995                             | 0.9996              | 0.9986               |
| 288 | Triadimenol        | 0.9967                             | 0.9754              | 0.9975               |
| 289 | Tri-allate         | 0.9929                             | 0.9991              | 0.9717               |
| 290 | Triazophos         | 0.9415                             | 0.9969              | 0.9975               |
| 291 | Tridiphane         | 0.9370                             | 0.9953              | 0.9965               |
| 292 | Trifloxystrobin    | 0.9763                             | 0.9978              | 0.9991               |
| 293 | Triflumizole       | 0.9989                             | 0.9994              | 0.9993               |
| 294 | Trifluralin        | 0.9994                             | 0.9986              | 0.9996               |
| 295 | Vinclozolin        | 0.9971                             | 0.9994              | 0.9949               |
| 296 | Zoxamide           | 0.9957                             | 0.9985              | 0.9995               |
