# Supplementary material for: Simultaneous analytical method for 296 pesticide multiresidues in root and rhizome based herbal medicines with GC-MS/MS
Source: PubMed Central journal article supplement (PMC10325055; doi:10.1371/journal.pone.0288198), 2023-07-06
Supplement: pone.0288198.s003.pdf [file pone.0288198.s003.pdf]

**S3 Table. Quantitation results of pesticide multiresidues in *C. officinale*, *R. glutinosa*, and *P. lactiflora* obtained from commercial markets.**

| <b><i>C. officinale</i> from Republic of Korea (A1 to A14)</b> |    |       |      |       |       |      |       |       |      |      |       |      |      | (µg/kg) |
|----------------------------------------------------------------|----|-------|------|-------|-------|------|-------|-------|------|------|-------|------|------|---------|
| Name                                                           | A1 | A2    | A3   | A4    | A5    | A6   | A7    | A8    | A9   | A10  | A11   | A12  | A13  | A14     |
| Bifenthrin                                                     | -  | -     | 21.9 | -     | -     | -    | 10.5  | -     | 24.1 | -    | 31.5  | -    | 25.5 | 24.4    |
| Chlorpyrifos                                                   | -  | -     | -    | 21.5  | -     | 15.2 | 24.1  | 25.9  | -    | 29.2 | -     | -    | 41.2 | -       |
| Difenoconazole                                                 | -  | -     | 21.5 | 52.2  | 33.1  | -    | 28.1  | 31.2  | -    | -    | 32.1  | -    | 35.1 | -       |
| Dimethomorph                                                   | -  | -     | 89.2 | 140.5 | -     | 90.1 | -     | 150.5 | 50.2 | -    | 139.2 | -    | -    | -       |
| Diniconazole                                                   | -  | -     | -    | 30.9  | -     | -    | -     | 33.3  | -    | -    | -     | -    | 32.9 | -       |
| Metribuzin                                                     | -  | -     | -    | -     | 19.5  | -    | 18.5  | -     | -    | -    | -     | 21.8 | -    | -       |
| Pendimethalin                                                  | -  | -     | -    | -     | 86.5  | -    | 110.5 | 90.5  | -    | -    | 70.5  | -    | 52.1 | -       |
| Quinalphos                                                     | -  | -     | -    | 10.5  | -     | -    | 11.9  | 15.8  | -    | 21.5 | -     | 24.5 | -    | -       |
| Tebuconazole                                                   | -  | -     | 28.9 | -     | -     | 52.5 | -     | 32.5  | -    | -    | 21.5  | -    | -    | -       |
| Tebufenpyrad                                                   | -  | -     | -    | 9.7   | -     | -    | 32.5  | -     | -    | 21.9 | -     | -    | -    | -       |
| <b><i>C. officinale</i> from China (B1 to B5)</b>              |    |       |      |       |       |      |       |       |      |      |       |      |      | (µg/kg) |
| Not detected in all samples                                    |    |       |      |       |       |      |       |       |      |      |       |      |      |         |
| <b><i>R. glutinosa</i> from Republic of Korea (C1 to C8)</b>   |    |       |      |       |       |      |       |       |      |      |       |      |      | (µg/kg) |
| Name                                                           | C1 | C2    | C3   | C4    | C5    | C6   | C7    | C8    |      |      |       |      |      |         |
| Dimethomorph                                                   | -  | 285.1 | 58.2 | -     | 100.5 | 85.2 | 321.5 | -     |      |      |       |      |      |         |
| <b><i>R. glutinosa</i> from China (D1 to D7)</b>               |    |       |      |       |       |      |       |       |      |      |       |      |      | (µg/kg) |
| Not detected in all samples                                    |    |       |      |       |       |      |       |       |      |      |       |      |      |         |
| <b><i>P. lactiflora</i> from Republic of Korea (E1 to E10)</b> |    |       |      |       |       |      |       |       |      |      |       |      |      | (µg/kg) |
| Not detected in all samples                                    |    |       |      |       |       |      |       |       |      |      |       |      |      |         |
| <b><i>P. lactiflora</i> from China (F1 to F3)</b>              |    |       |      |       |       |      |       |       |      |      |       |      |      | (µg/kg) |
| Not detected in all samples                                    |    |       |      |       |       |      |       |       |      |      |       |      |      |         |
