# Supplementary material for: Simultaneous analytical method for 296 pesticide multiresidues in root and rhizome based herbal medicines with GC-MS/MS
Source: PubMed Central journal article supplement (PMC10325055; doi:10.1371/journal.pone.0288198), 2023-07-06
Supplement: pone.0288198.s004.pdf [file pone.0288198.s004.pdf]

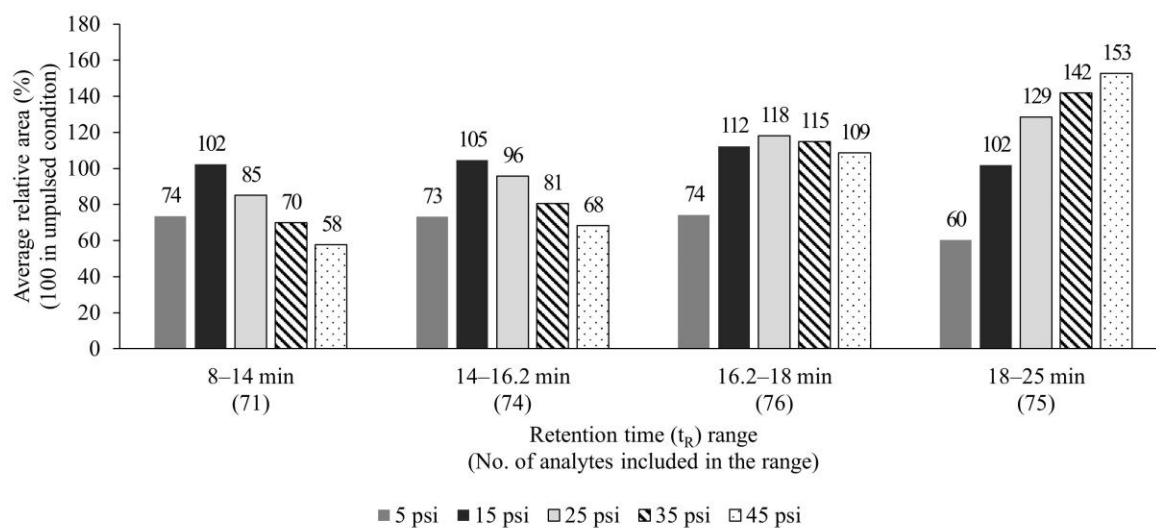

**S1 Fig. The average relative intensity (area) of target pesticides grouped by the four retention time ( $t_R$ ) segments (8–14, 14–16.2, 16.2–18, and 18–25 min). The average relative intensity in unpulsed injection was set to 100%.**
