# Supplementary material for: Simultaneous analytical method for 296 pesticide multiresidues in root and rhizome based herbal medicines with GC-MS/MS
Source: PubMed Central journal article supplement (PMC10325055; doi:10.1371/journal.pone.0288198), 2023-07-06
Supplement: pone.0288198.s006.pdf [file pone.0288198.s006.pdf]

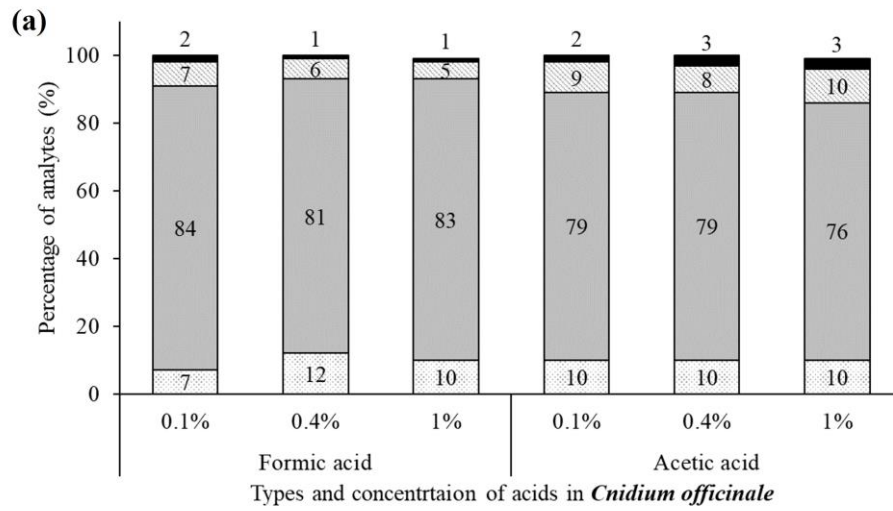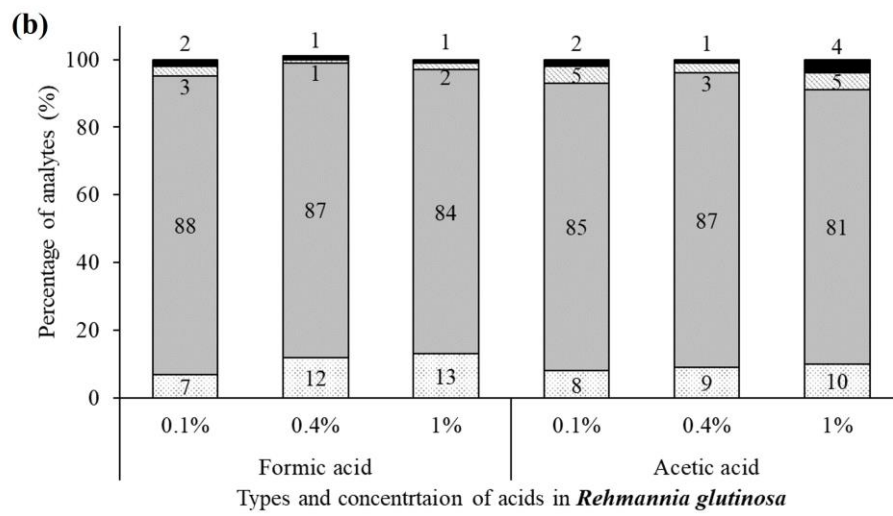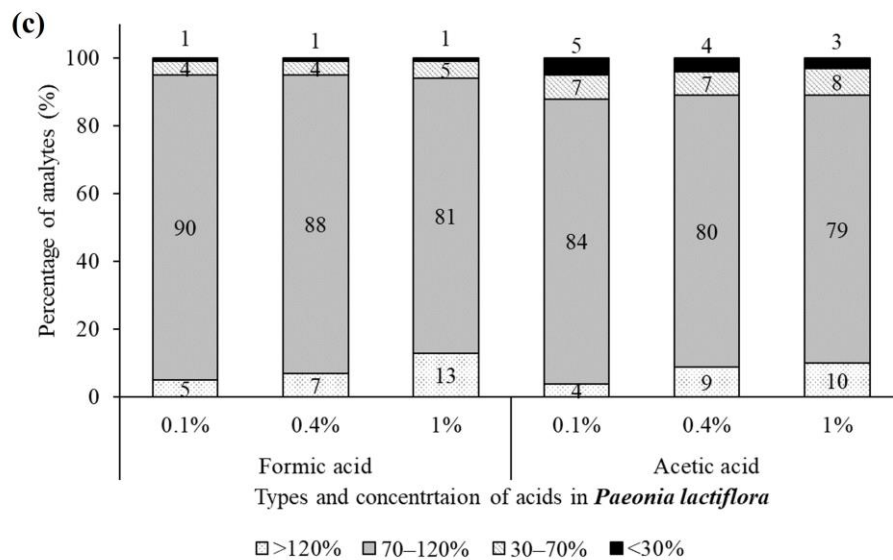

**S3 Fig. Distributions of recovery ranges of target pesticides when using 0.1, 0.4, and 1% formic acid or acetic acid in ACN/EA (7:3, v/v).**
