# Supplementary material for: Simultaneous analytical method for 296 pesticide multiresidues in root and rhizome based herbal medicines with GC-MS/MS
Source: PubMed Central journal article supplement (PMC10325055; doi:10.1371/journal.pone.0288198), 2023-07-06
Supplement: pone.0288198.s007.pdf [file pone.0288198.s007.pdf]

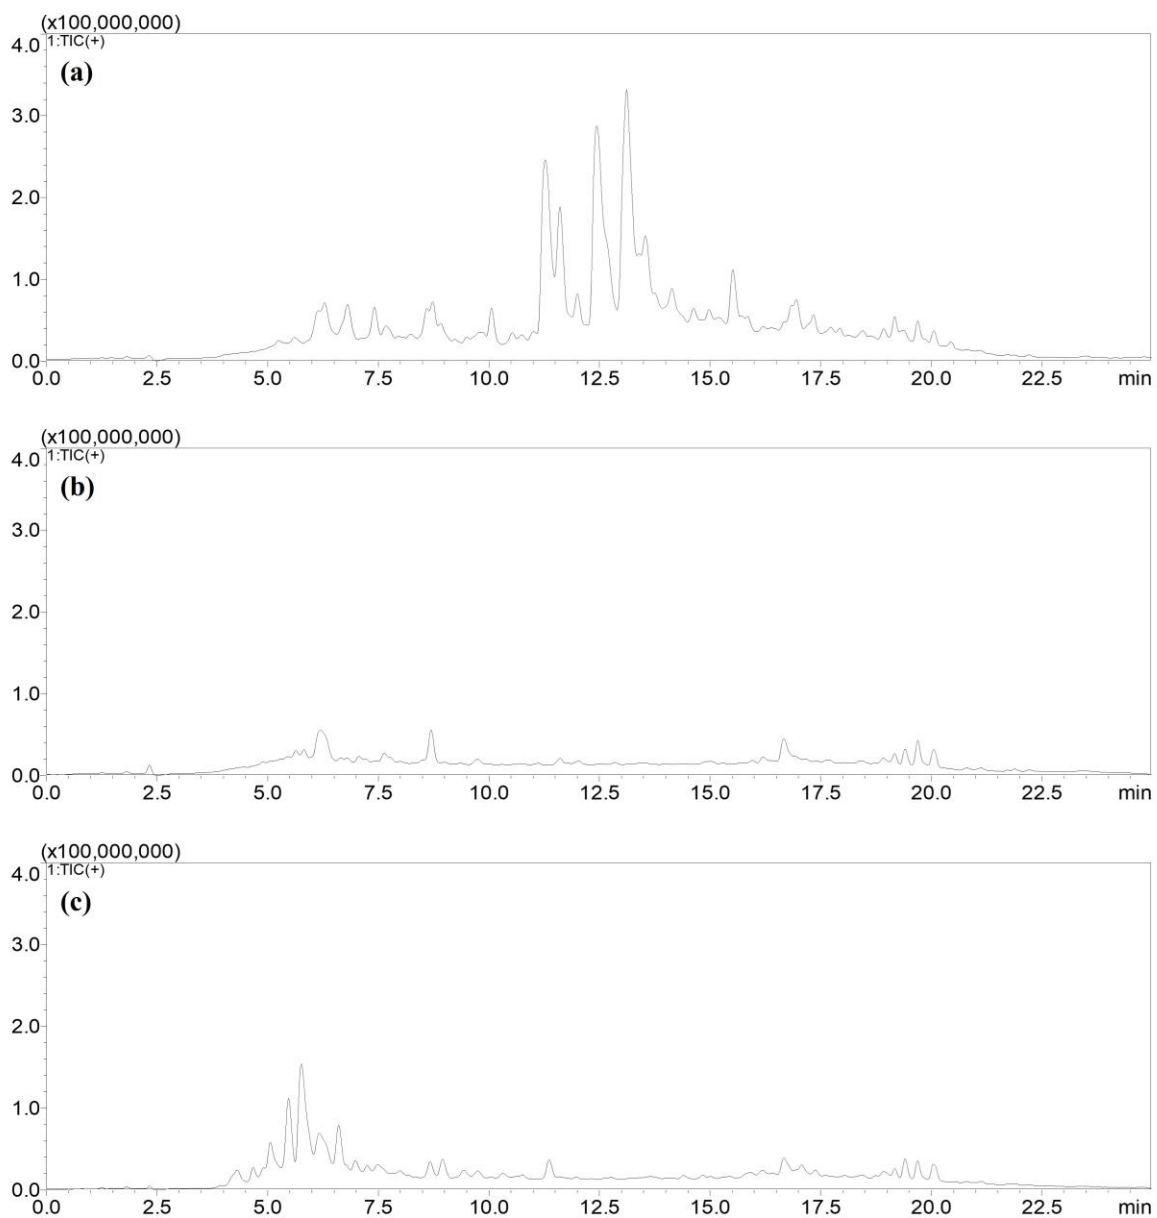

**S4 Fig. Total ion chromatograms (TICs) through full scan analysis ( $m/z$  range 50–500). Control (pesticide-free) samples of (a) *C. officinale*, (b) *R. glutinosa*, and (c) *P. lactiflora* were analyzed after preparation using the established method.**
